# Supplementary material
Source: Springer Nature journal article supplement (https://www.springermedizin.de/resource/supplementary/12990_2008_183_MOESM5_ESM.pdf/9612746)
Supplement: MOESM5 [file 9612746]

Table1. Effect of selective and non-selective AMPA receptor antagonists on locomotor functions

| Treated group                  | Placing    | Grasping   | Righting |
|--------------------------------|------------|------------|----------|
| Saline                         | 5 (0)      | 5 (0)      | 5 (0)    |
| DMSO (10%)                     | 5 (0)      | 5 (0)      | 5 (0)    |
| CNQX (6.1 $\mu\text{g}$ )      | 5 (0)      | 5 (0)      | 5 (0)    |
| CFM-2 (50 $\mu\text{g}$ )      | 5 (0)      | 4.8 (0.45) | 5 (0)    |
| GYKI 52466 (50 $\mu\text{g}$ ) | 4.6 (0.25) | 5 (0)      | 5 (0)    |

Mean (SE), n = 5, 5 trials
